# Supplementary material
Source: HighWire-hosted journal article supplement (https://gut.bmj.com/content/gutjnl-2020-323553)
Supplement: inline-supplementary-material-4 [file inline-supplementary-material-4.pdf]

**Supplementary Table 1.** Cancer sphere cells and their mutational profiles, ERBB2 status and CD44v6 expression.

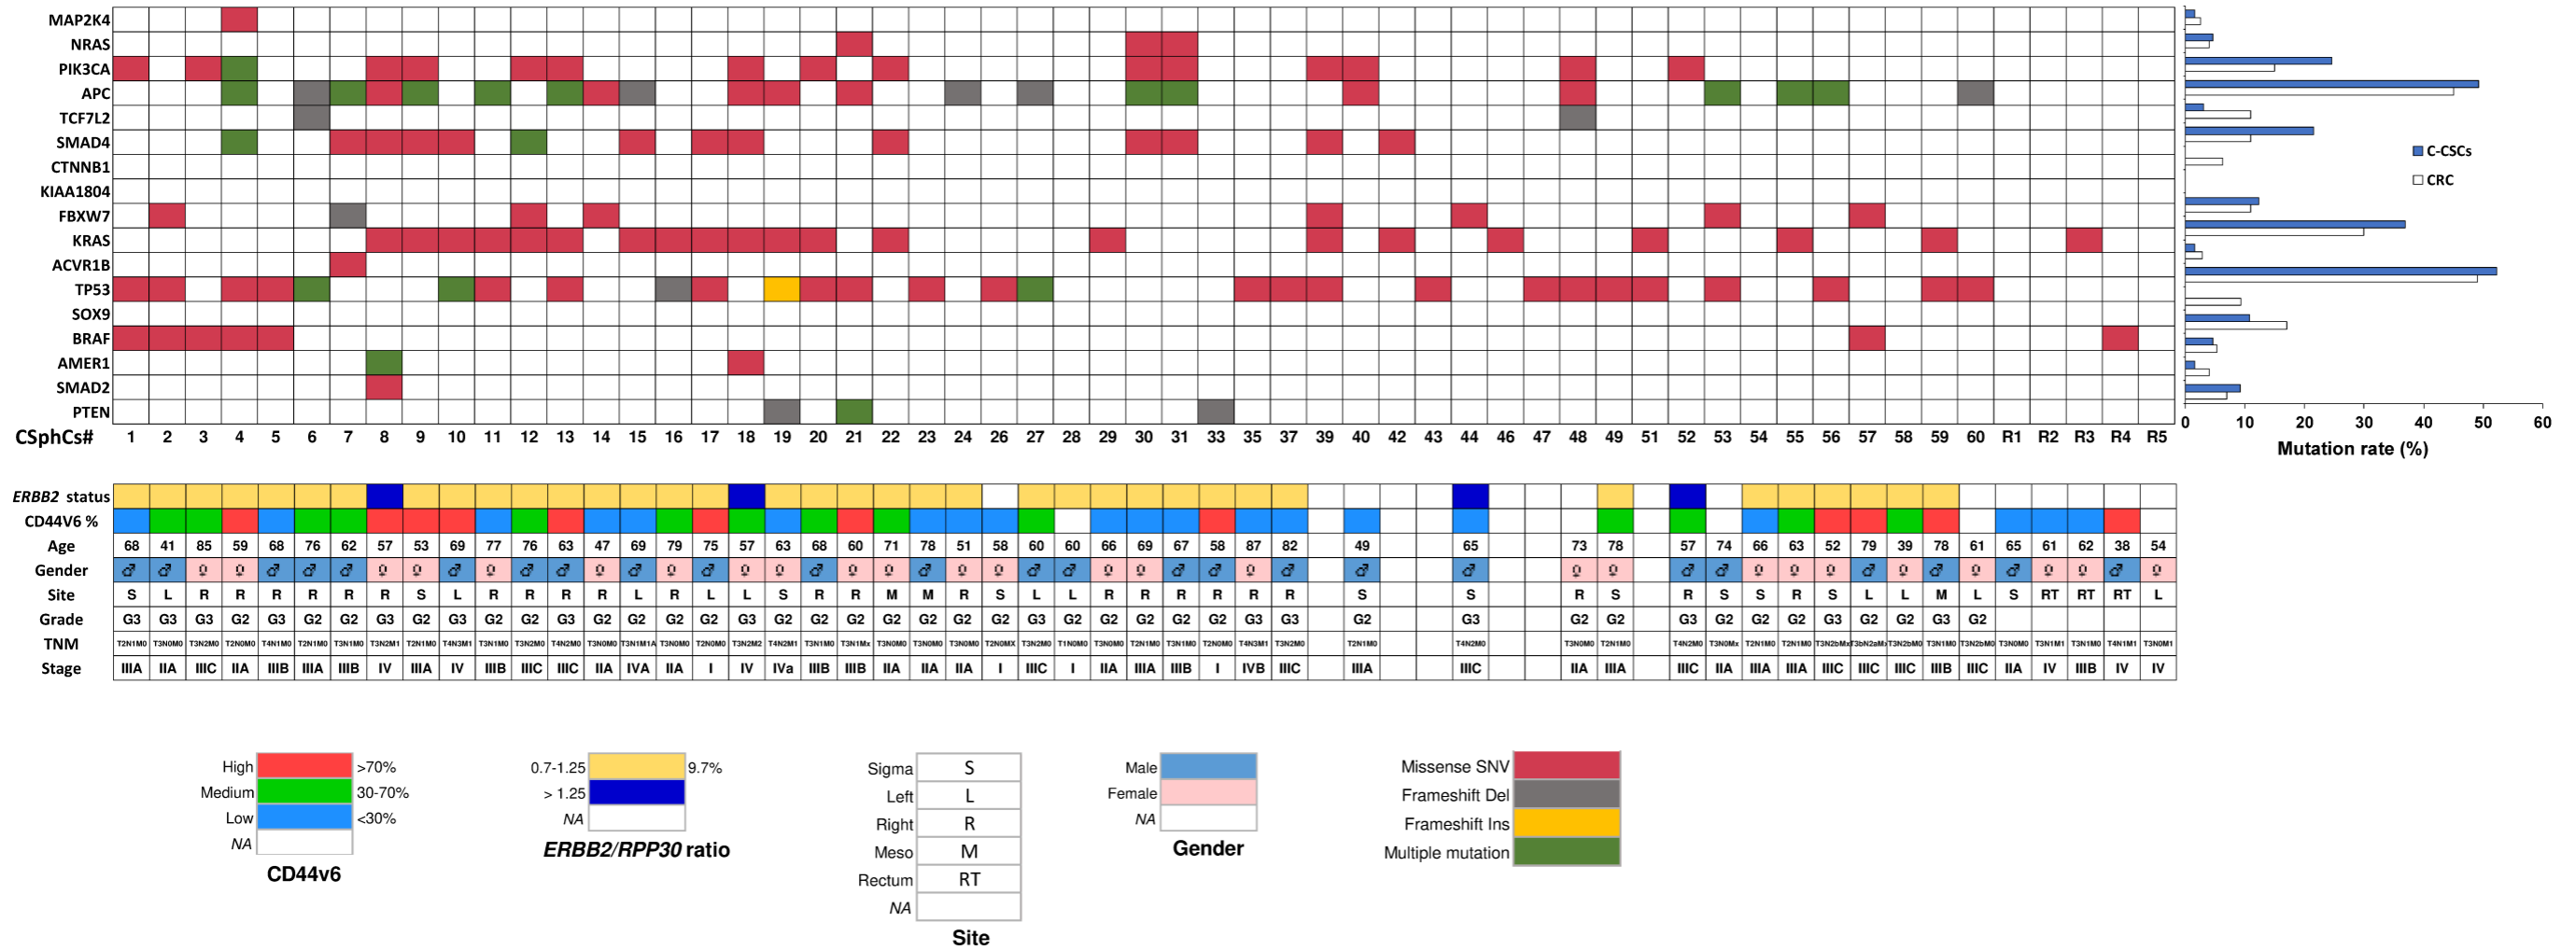

COSMIC-reported mutation of the analyzed genes (*upper panel*). Mutation types (missense SNV, frameshift deletion or insertion, and multiple mutations) are indicated. Percentage of mutation rate in CRC patients reported in TCGA database (white bars) and in C-CSCs (blue bars) are indicated on the right. ERBB2 status and CD44v6 expression of CSphCs and clinical data related to CRC patients are reported (*lower panel*).
